# Supplementary material
Source: publisher figshare collection journal article supplement (https://acs.figshare.com/ndownloader/files/4120561)

# Supporting Information

## **Prediction** of methyl mercury uptake by rice plants (*Oryza sativa* L.) using the DGT technique

JINLING LIU<sup>†, ‡</sup>, XINBIN FENG<sup>†, \*</sup>, GUANGLE QIU<sup>†</sup>, CHRISTOPHER W. N.  
ANDERSON<sup>§</sup>, HENG YAO<sup>†</sup>

<sup>†</sup> State Key Laboratory of Environmental Geochemistry, Institute of Geochemistry, Chinese  
Academy of Sciences, Guiyang 550002,

<sup>‡</sup> South China Sea Institute of Oceanology, Chinese Academy of Sciences, Guangzhou, 510301,  
P.R. China

<sup>§</sup>Soil and Earth Sciences Group, Institute of Natural Resources, Massey University, Palmerston  
North, New Zealand

\* Corresponding author: Xinbin Feng

Phone: +86-851-5891356

Fax: +86-851-5891609

E-mail: [fengxinbin@vip.skleg.cn](mailto:fengxinbin@vip.skleg.cn)

**6 pages in total, 1 Table, 3 Figures**

1     **Detailed information concerning the Quality Control**

2             The method detection limits ( $3\times\sigma$ ) were  $0.002\text{ ng g}^{-1}$  for MeHg in tissues of rice  
3     samples as well as in soil samples. The detection limit of the DGT method for MeHg  
4     is  $0.014\text{ ng L}^{-1}$ . The relative standard deviation for analysis of duplicate samples was  
5      $\leq 10\%$  for MeHg. The field blank for DGT was  $0.042 \pm 0.037\text{ ng L}^{-1}$  ( $n=15$ ).  
6     Recoveries for matrix spikes ranged from 80% to 116% for MeHg. Certified reference  
7     materials, including the National Research Centre for Certified Reference Materials  
8     rice standard GBW08508, the National Research Council of Canada Lobster  
9     Hepatopancreas standard TORT-2, the Institute of Geophysical and Geochemical  
10    Exploration, China, soil standard GBW 07405 and the International Atomic Energy  
11    Agency sediment standard IAEA-356, were used for quality control of rice plant and  
12    soil sample analysis. The corresponding analytical results for these reference  
13    materials are described in supporting information Table S1.

14

1

2 **Table S1 List of Certified reference materials used in the present study and the**  
 3 **results obtained.**

| Producer | CRM      | n  | Hg speciation               | Obtained value | Certified value |
|----------|----------|----|-----------------------------|----------------|-----------------|
| NRCCRM*  | GBW08508 | 10 | THg (mg kg <sup>-1</sup> )  | 0.036±0.002    | 0.038±0.003     |
| NRCC**   | TORT-2   | 10 | THg (mg kg <sup>-1</sup> )  | 0.27±0.03      | 0.27±0.06       |
| NRCC**   | TORT-2   | 10 | MeHg (mg kg <sup>-1</sup> ) | 0.15±0.002     | 0.152±0.013     |
| IAEA***  | IAEA-356 | 5  | MeHg (mg kg <sup>-1</sup> ) | 0.0055±0.00016 | 0.0054±0.00089  |

4 \*NRC CRM: National Research Centre for Certified Reference Materials;

5 \*\*NRCC: National Research Council Canada;

6 \*\*\*IAEA: International Atomic Energy Agency

7

1  
2  
3  
4  
5  
  
6  
7

**Figure S1. The temporal variation of total mercury (THg) concentration in paddy soil during the rice growing season**

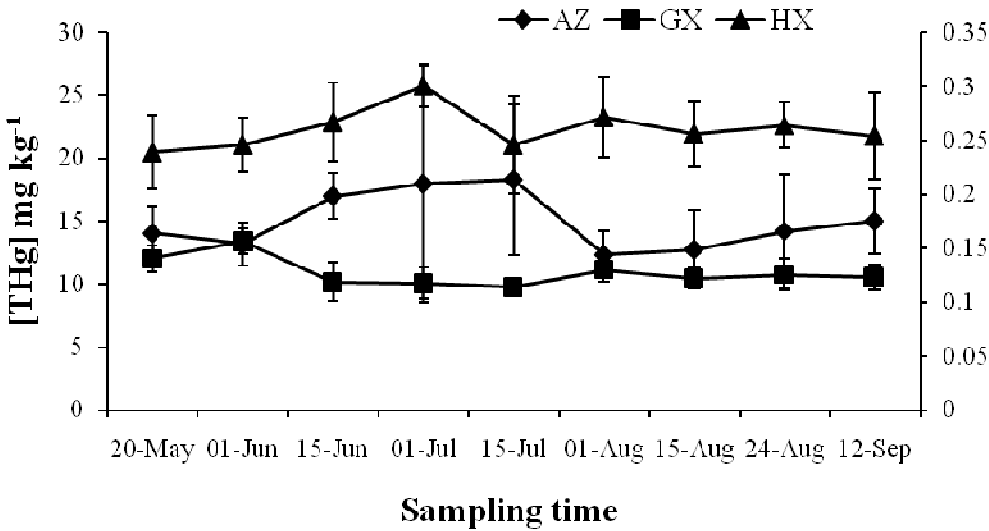

1 **Figure S2. Plots of MeHg concentration in rice plant tissues (root, stalk, leaf) as a**  
 2 **function of the MeHg concentration in soil quantified using the**  
 3 **KOH-methanol/solvent extraction technique**

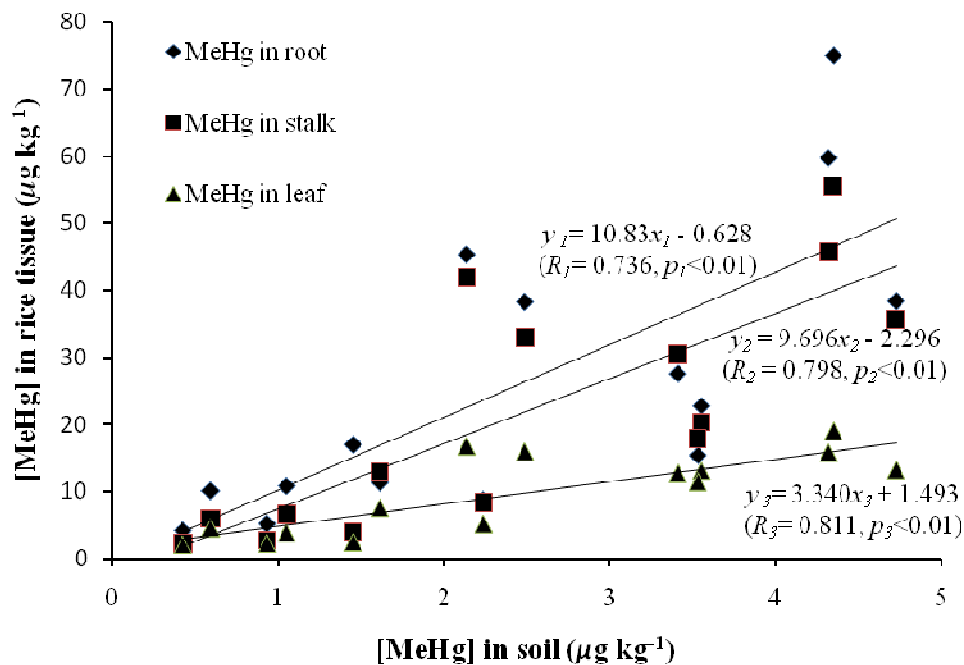

4

Figure S3.

- The linear regression fit for the correlation of the MeHg concentration in soil with that in pore water as measured by DGT (the bioavailable concentration)
- Plots of MeHg concentration in rice plant tissues (root, stalk, leaf) as a function of the MeHg concentration in pore water measured by DGT.

a.

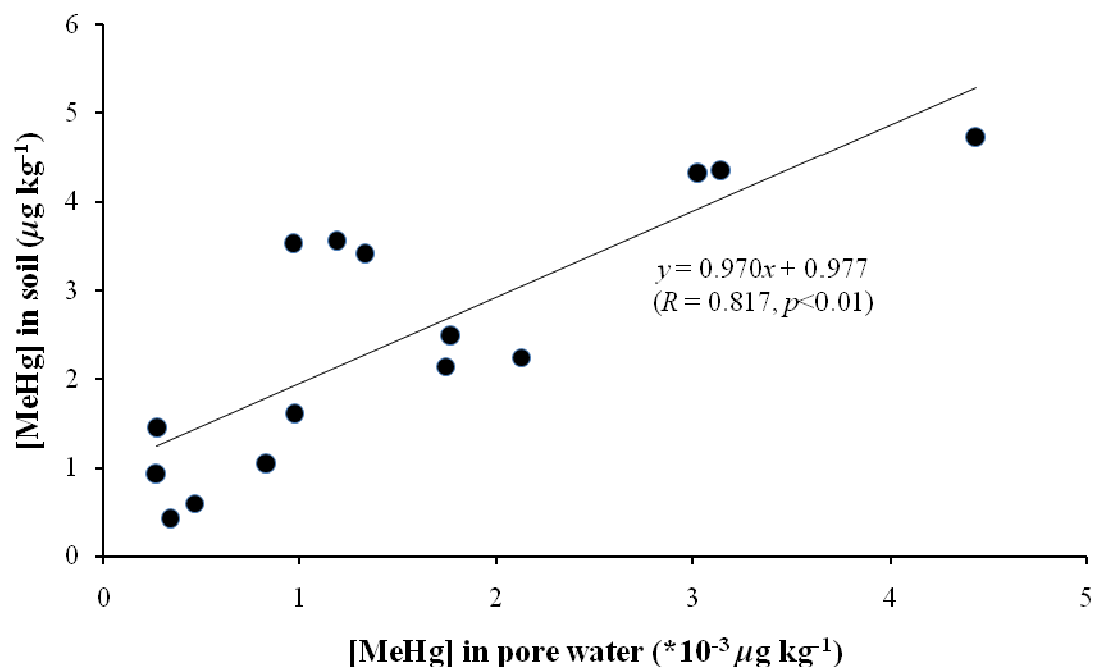

b.

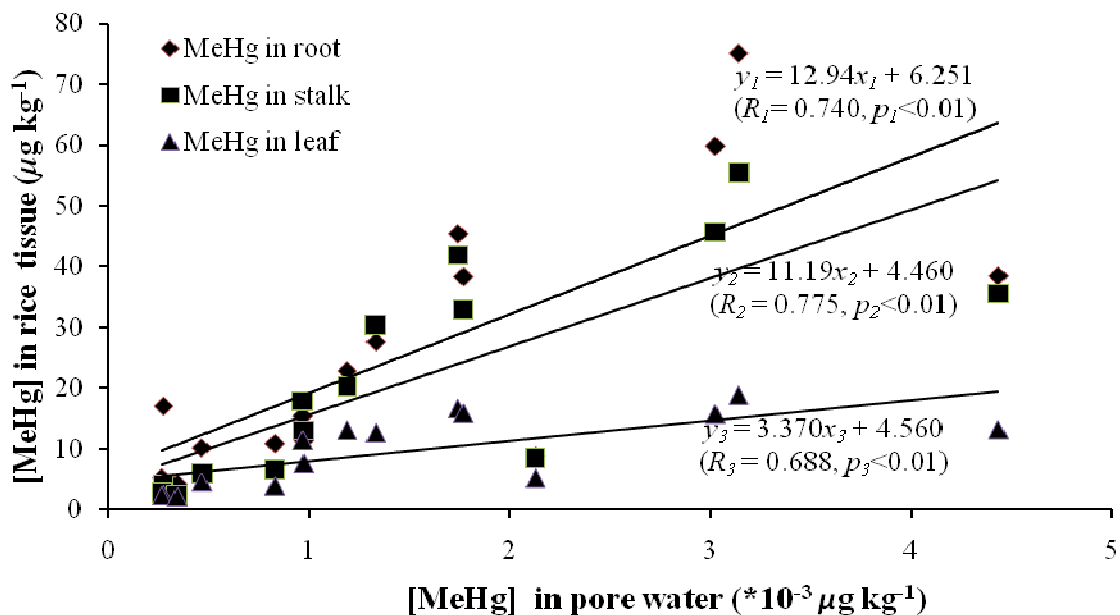

Supplement: Supplementary file 1 [file 4120561]
